# Supplementary material for: Lanthanide contraction and chelating effect on a new family of lanthanide complexes with tetrakis(O-isopropyl)methyle-nediphosphonate: synthesis, structures and terahertz time-domain spectroscopy
Source: Royal Society of Chemistry journal article supplement (doi:10.1039/c7ra07888a), 2017-01-01
Supplement: c7ra07888a1.pdf [file c7ra07888a1.pdf]

**Supporting information**

**Lanthanide contraction and chelating effect on a new family of lanthanide complexes with tetrakis(O-isopropyl)methylenediphosphonate: synthesis, structures, and terahertz time-domain spectroscopy**

**Yan Ma<sup>a</sup>, Yong-Sheng Yang<sup>a</sup>, Yu-Han Jiang<sup>a</sup>, Yue-Xue Li<sup>a</sup>, Min Liu<sup>b</sup>, Zhong-Feng Li<sup>a</sup>, Hong-Liang Han<sup>a</sup>, Yu-Ping Yang<sup>c</sup>, Xiu-Lan Xin<sup>d</sup>, Qiong-Hua Jin<sup>\*</sup>**

a. Department of Chemistry, Capital Normal University, Beijing 100048, Email: jinqh204.

b. The College of Materials Science and Engineering, Beijing University of Technology, Beijing 100022, China.

c. School of Science, Minzu University of China, Beijing 100081, China

School of Food and Chemical Engineering, Beijing Technology and Business University, Beijing 100048, China.

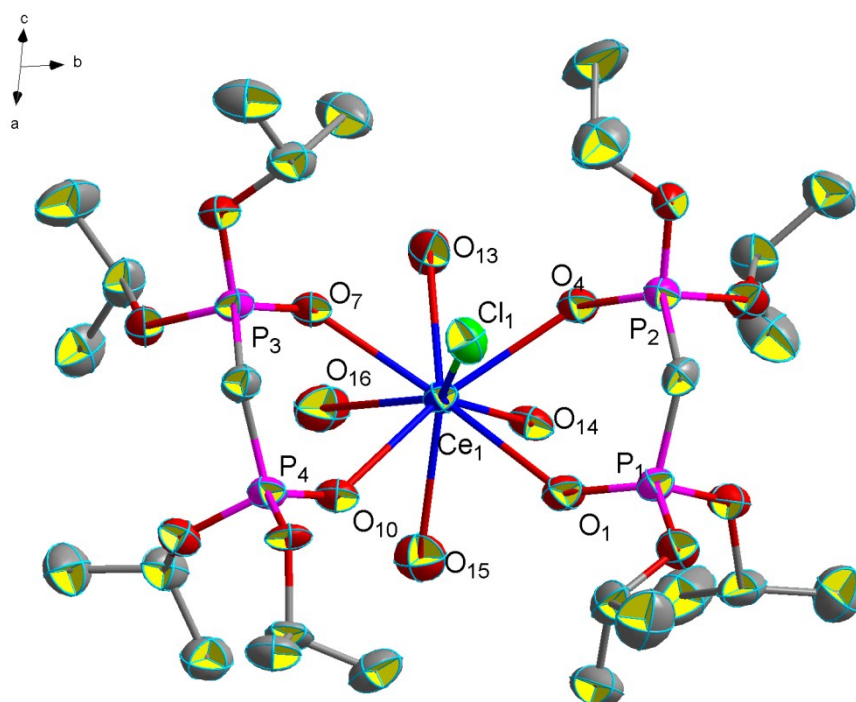

Fig.S1 Molecular structure of complex 2. Hydrogen atoms and solvent molecule were omitted for clarity.

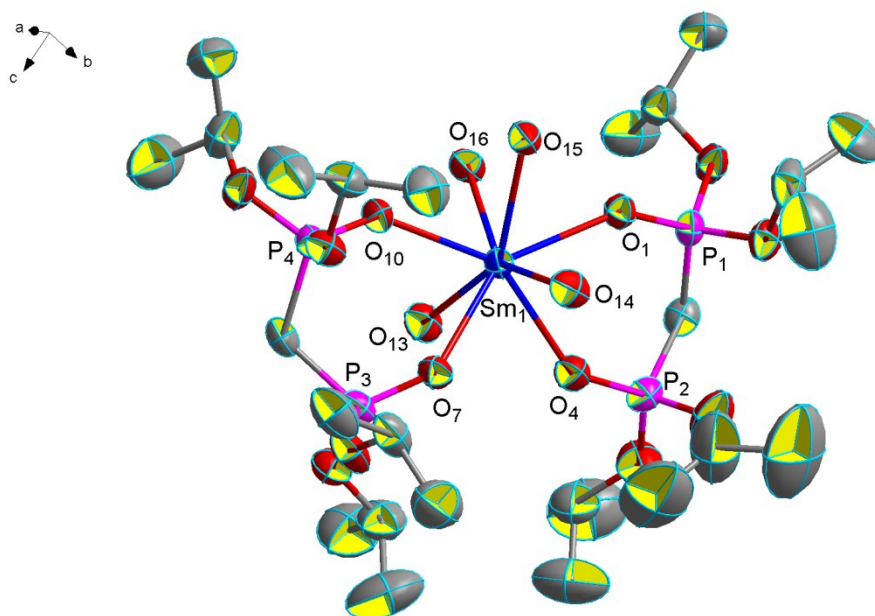

Fig.S2

Molecular structure of complex 4. Hydrogen atoms and solvent molecule were omitted for clarity.

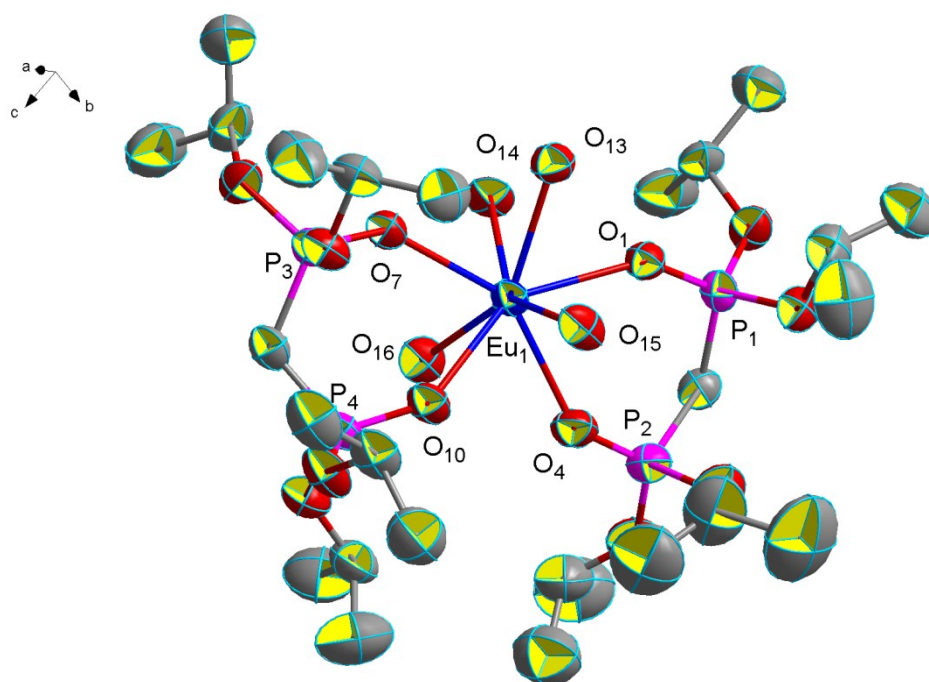

Fig.S3 Molecular structure of complex 5. Hydrogen atoms and solvent molecule

were omitted for clarity.

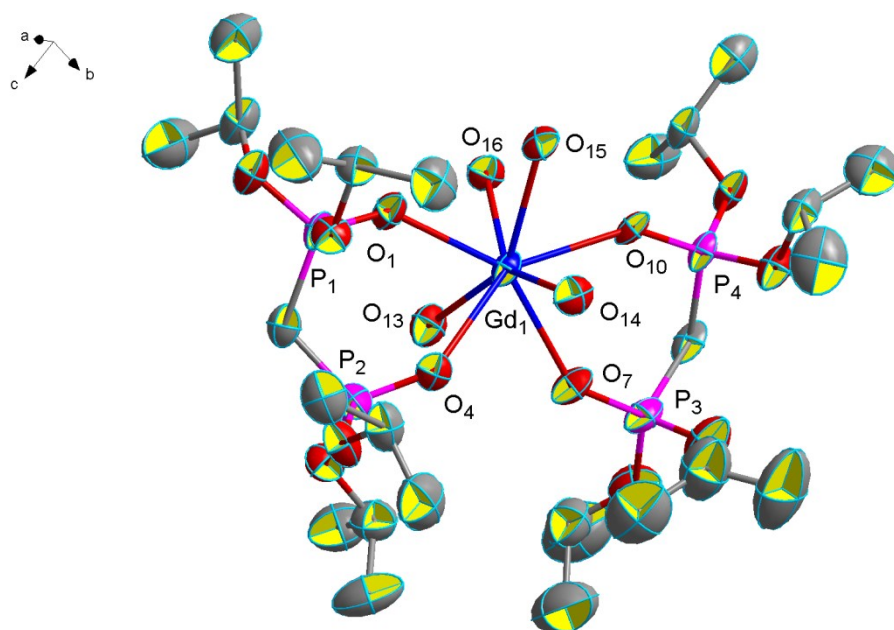

Fig.S4 Molecular structure of complex 6. Hydrogen atoms and solvent molecule were omitted for clarity.

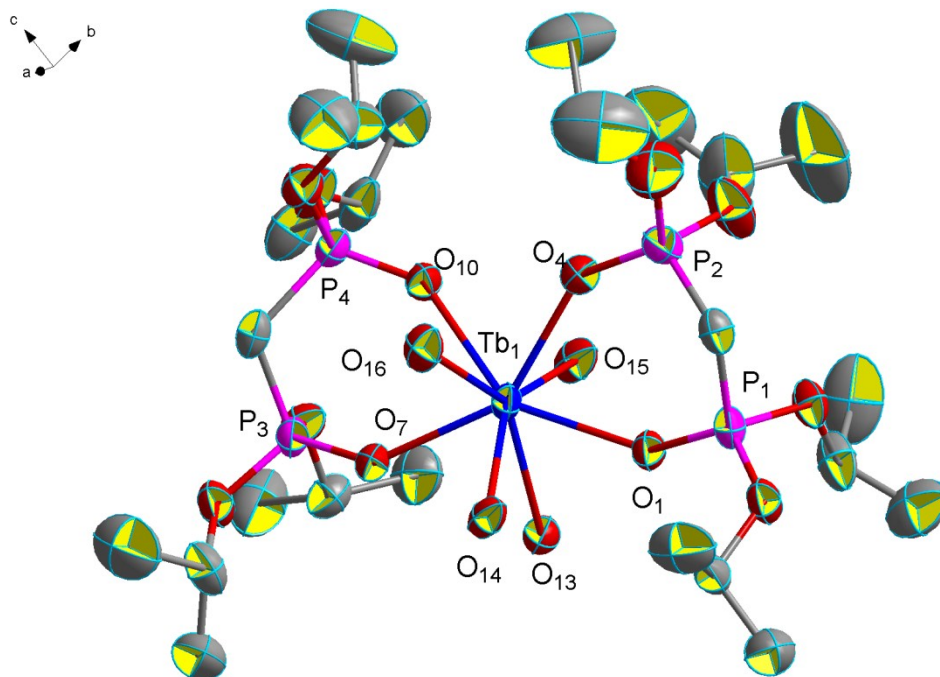

Fig.S5 Molecular structure of complex **7**. Hydrogen atoms and solvent molecule were omitted for clarity.

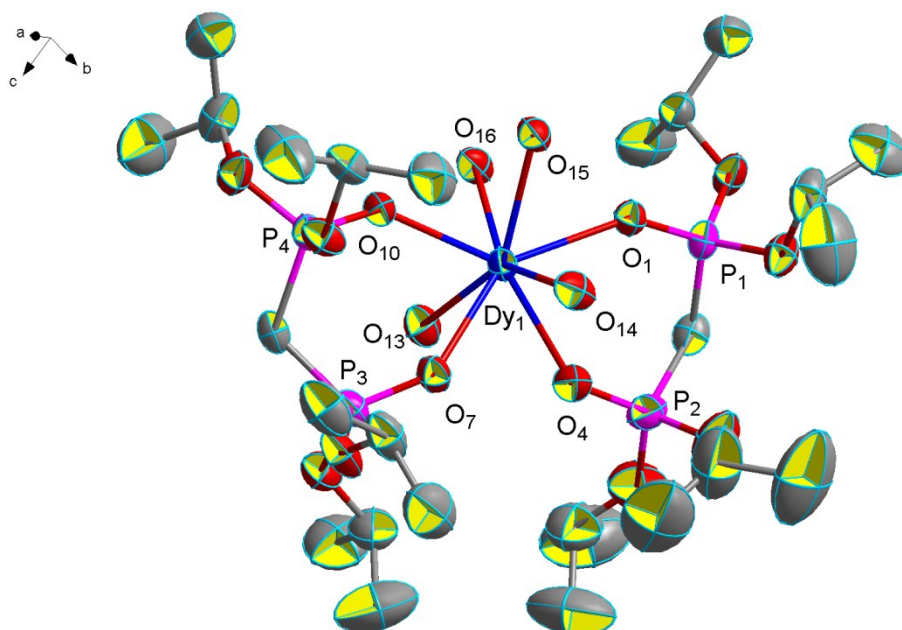

Fig.S6 Molecular structure of complex **8**. Hydrogen atoms and solvent molecule were omitted for clarity.

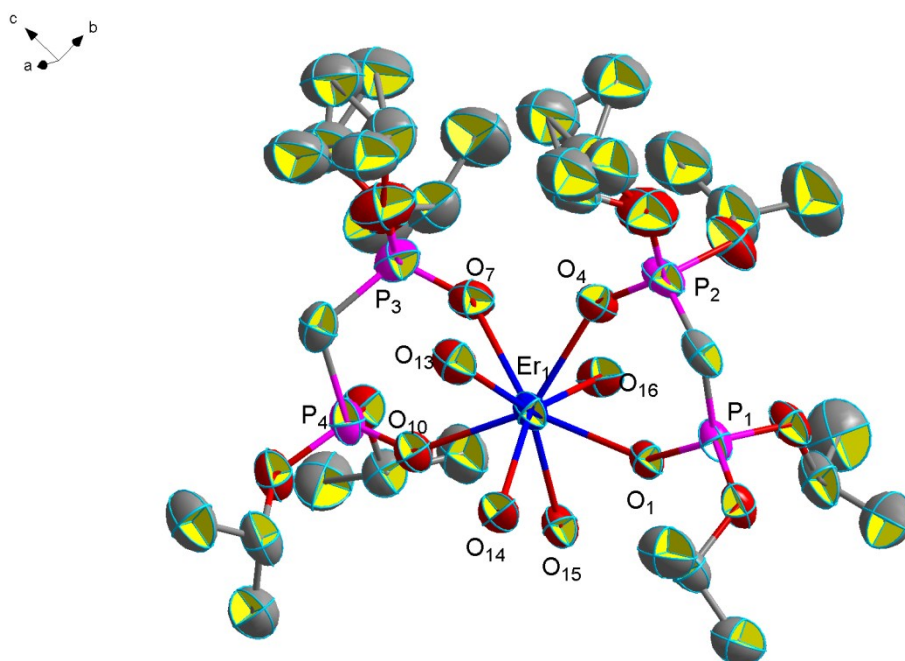

Fig.S7 Molecular structure of complex **9**. Hydrogen atoms and solvent molecule were omitted for clarity.

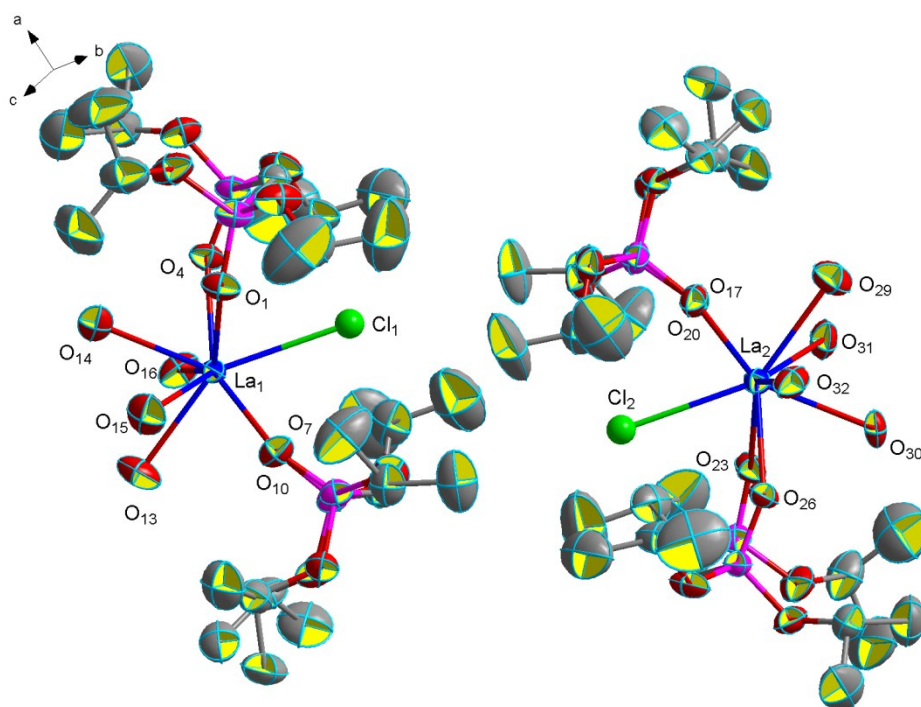

Fig.S8 Molecular structure of complex **10**. Hydrogen atoms and solvent molecule were omitted for clarity.

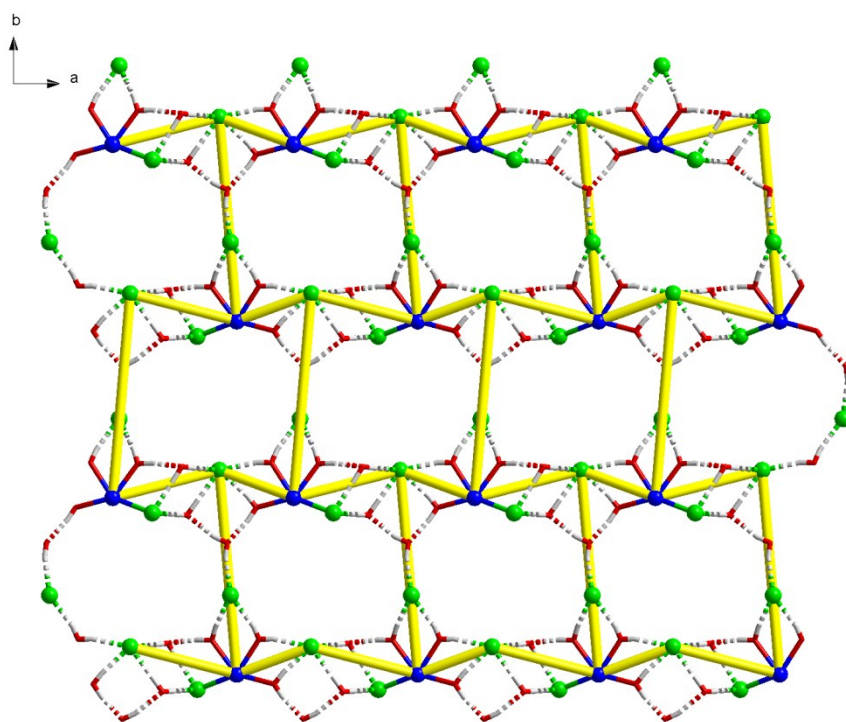

Fig.S9 Schematic representation of a two-dimensional mesh  $6^3$  topology formed by hydrogen bonds.

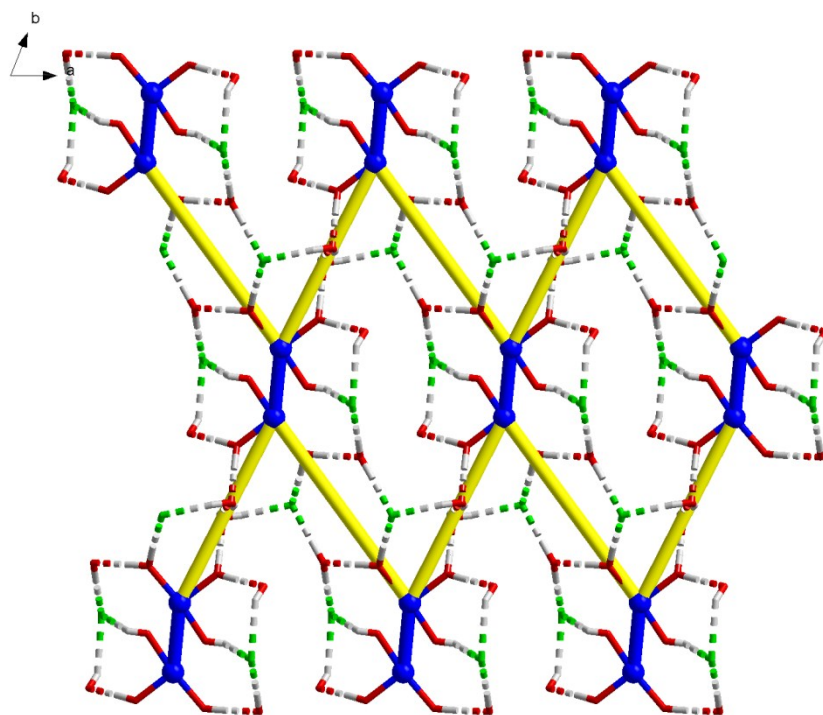

Fig.S10 Schematic representation of a two-dimensional mesh  $6^3$  topology formed by hydrogen bonds.

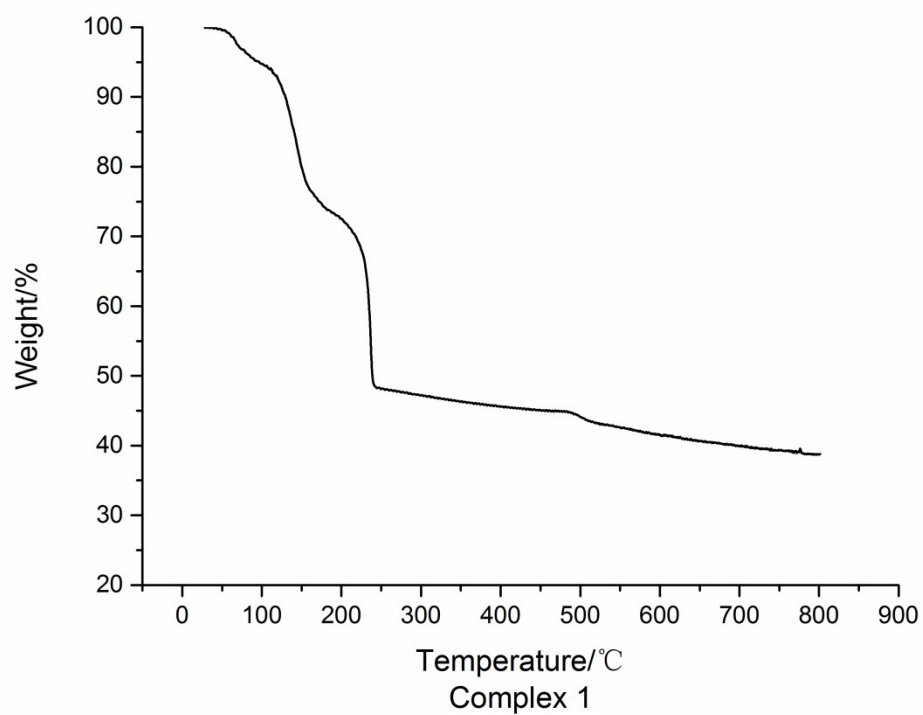

Fig. S11a. TG curves of the complexes **1**.

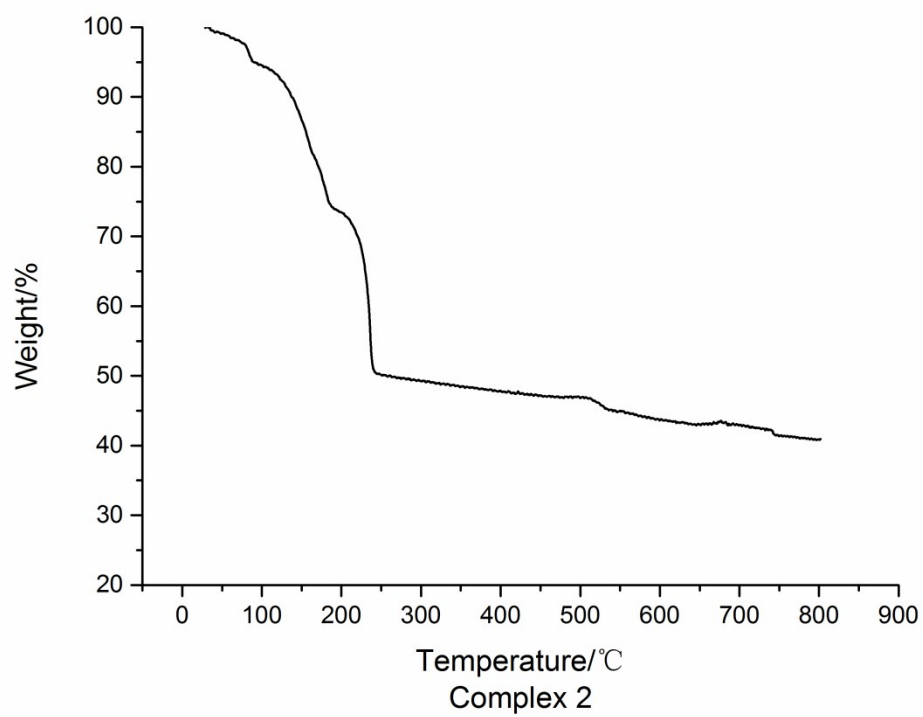

Fig. S11b. TG curves of the complexes **2**.

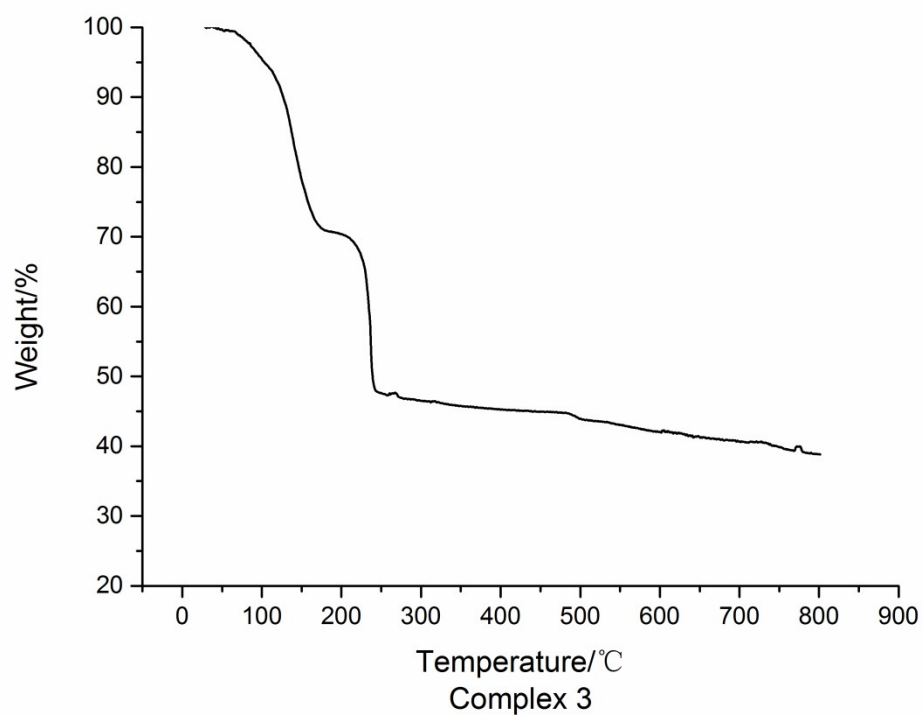

Fig. S11c. TG curves of the complexes **3**.

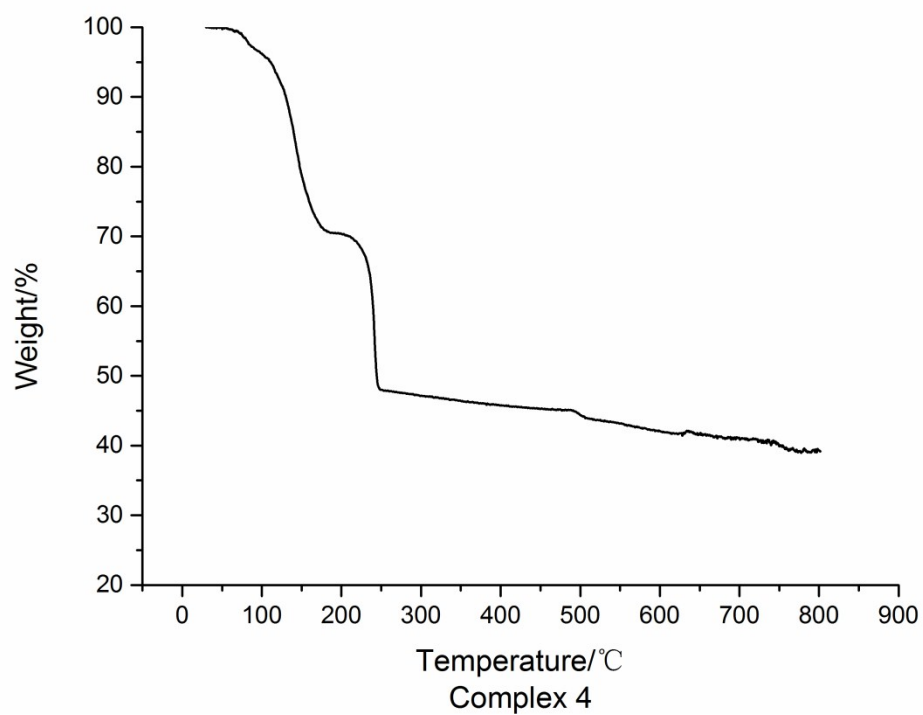

Fig. S11d. TG curves of the complexes **4**.

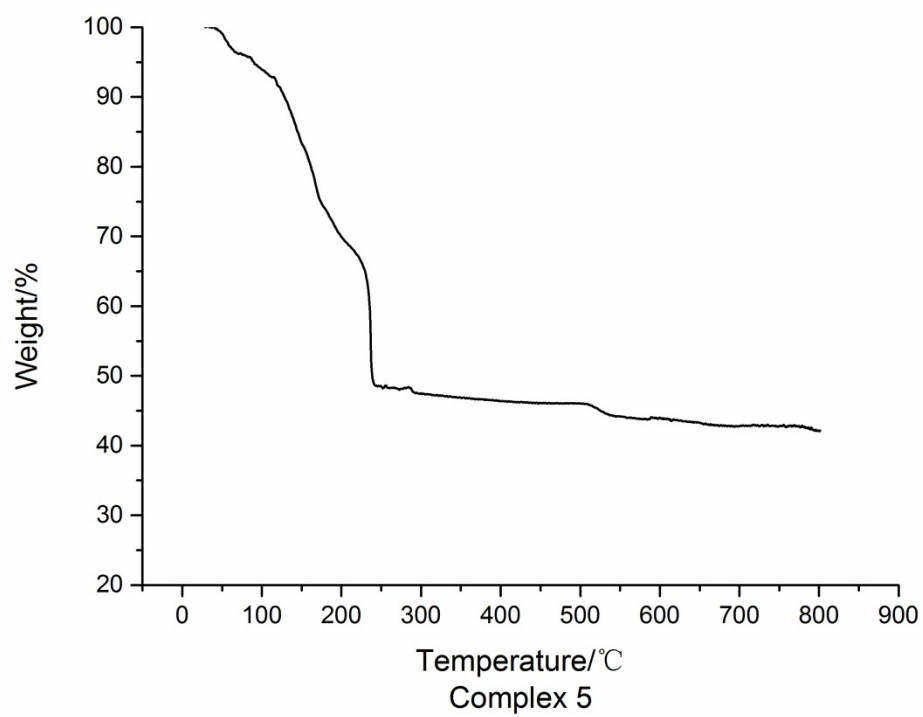

Fig. S11e. TG curves of the complexes **5**.

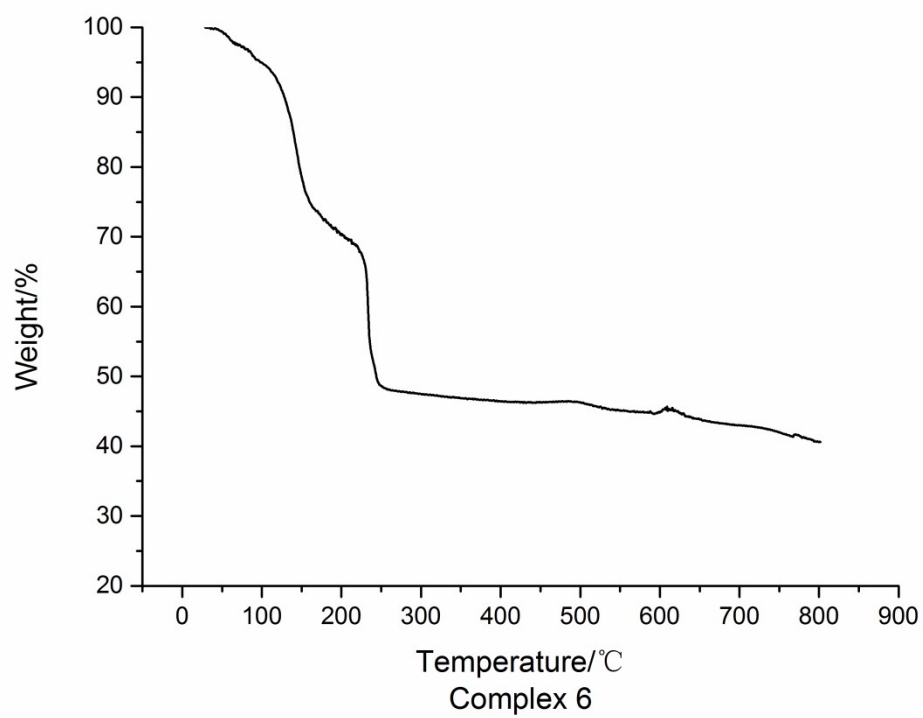

Fig. S11f. TG curves of the complexes **6**.

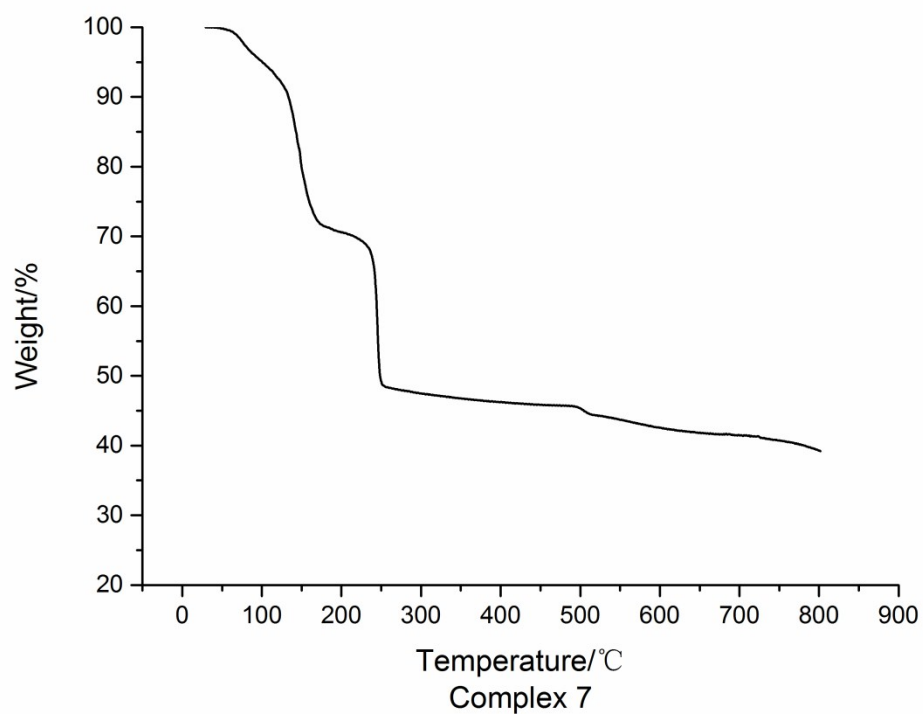

Fig. S11g. TG curves of the complexes 7.

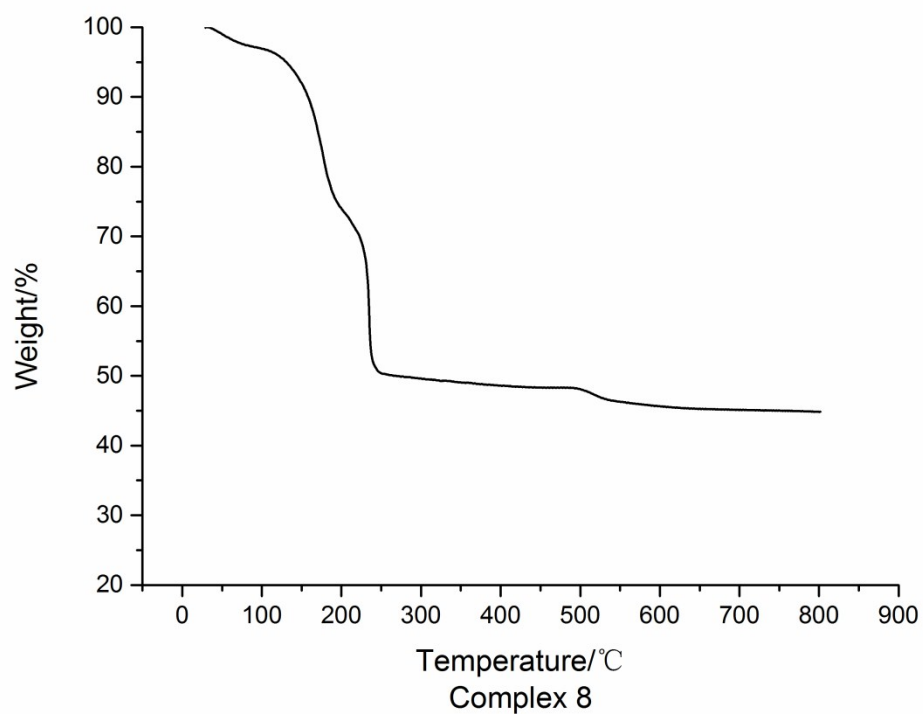

Fig. S11h. TG curves of the complexes **8**.

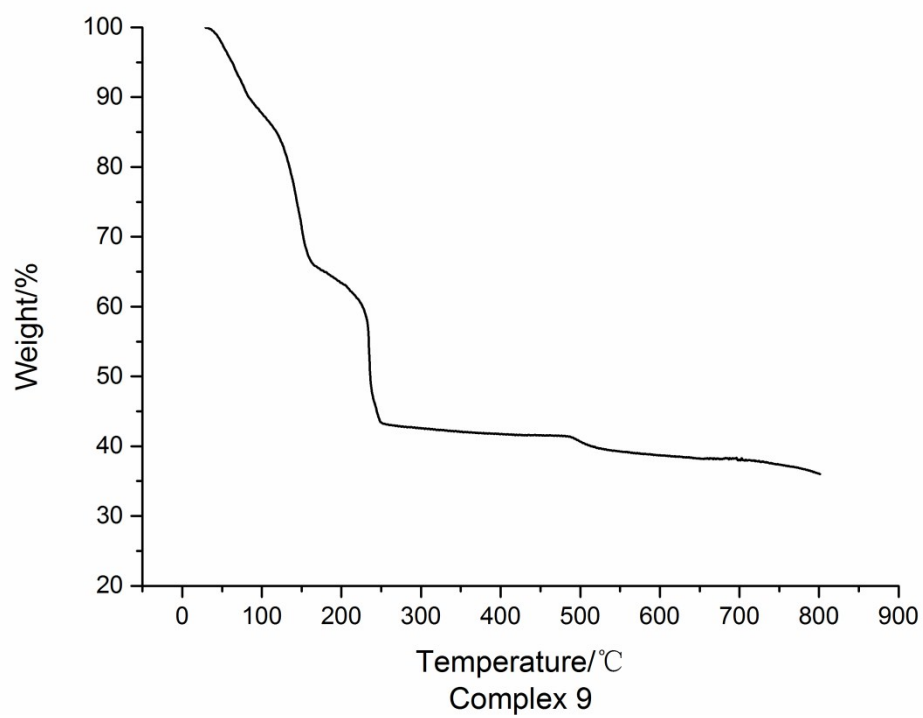

Fig. S11i. TG curves of the complexes **9**.

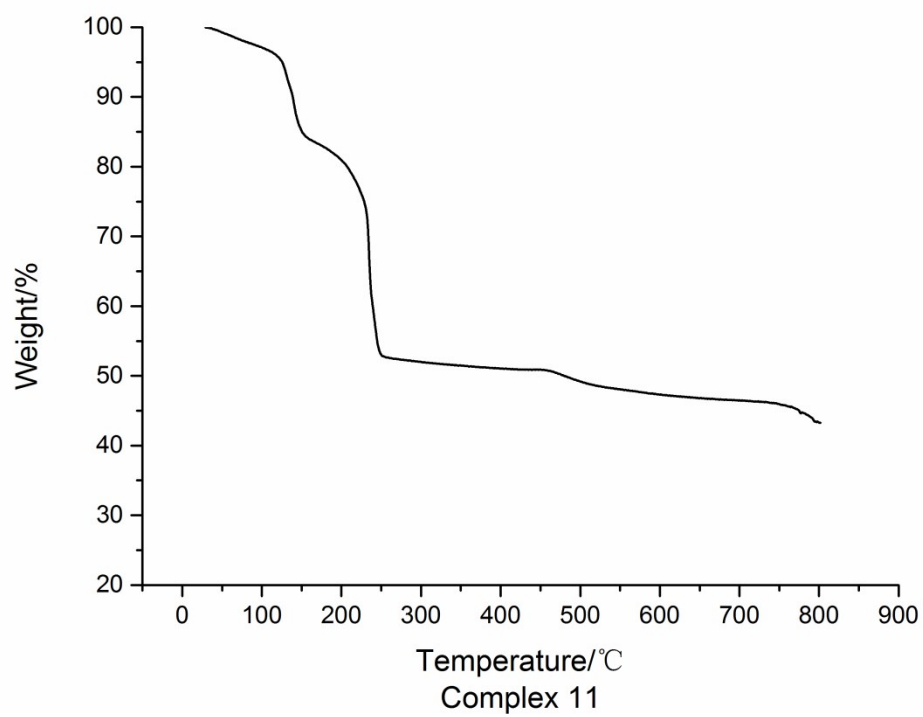

Fig. S11j. TG curves of the complexes **11**.

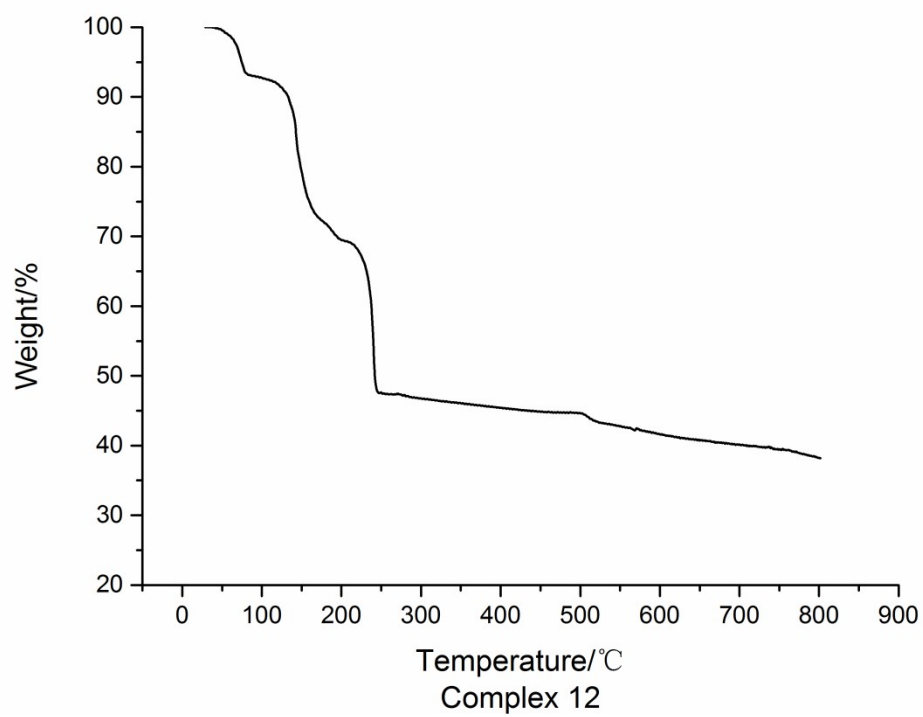

Fig. S11k. TG curves of the complexes **12**.

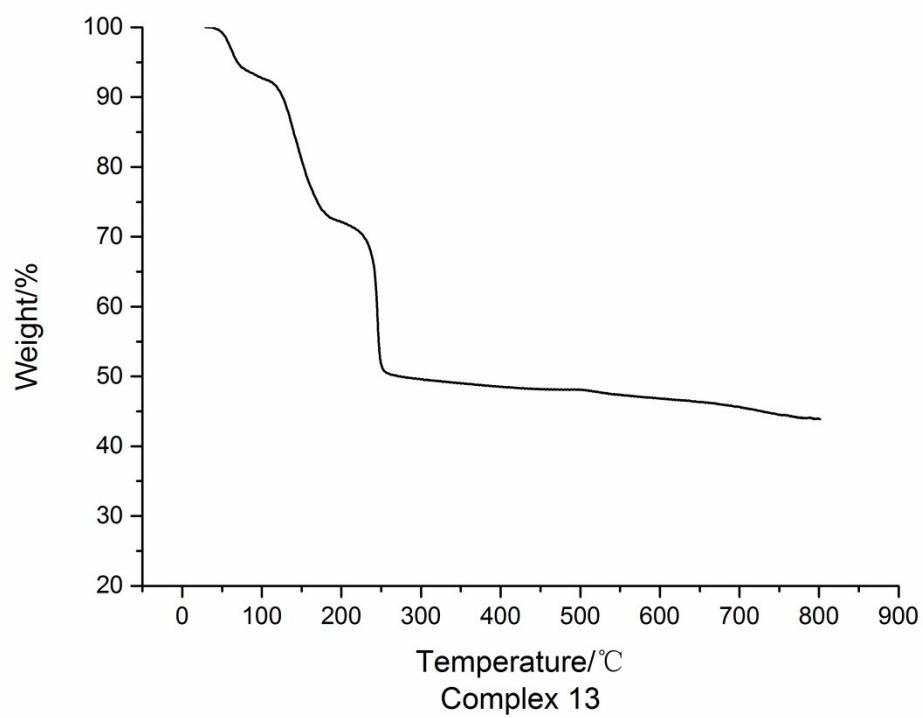

Fig. S11l. TG curves of the complexes **13**.

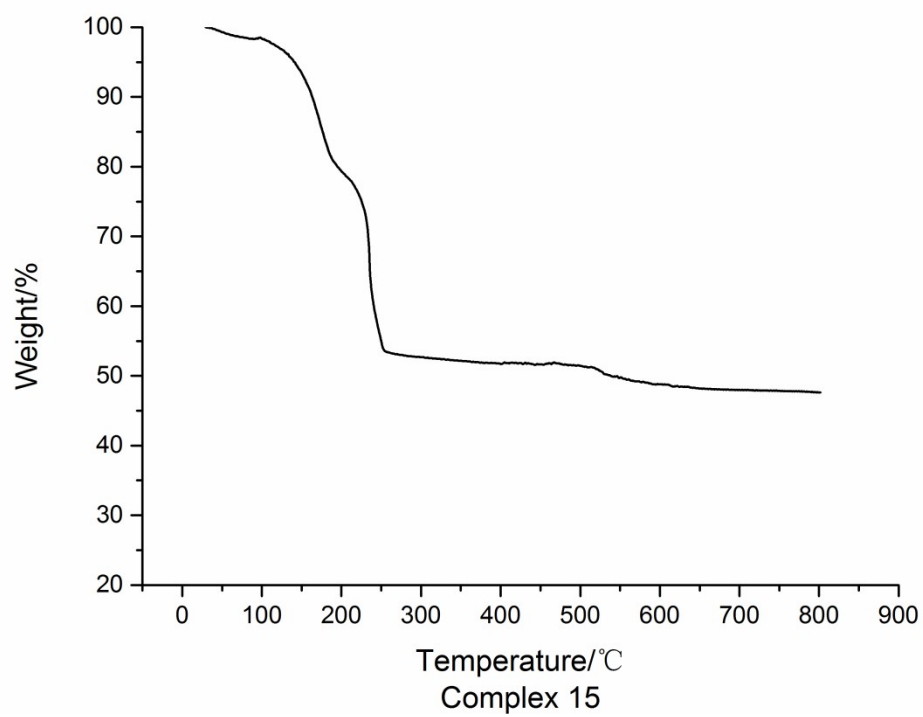

Fig. S11m. TG curves of the complexes **15**.

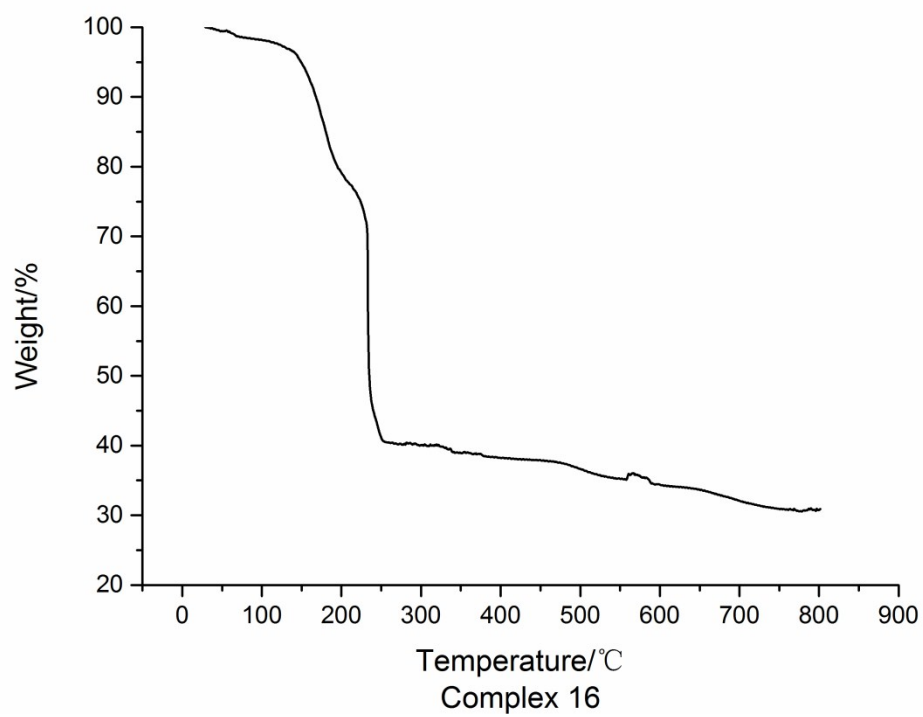

Fig. S11n. TG curves of the complexes **16**.

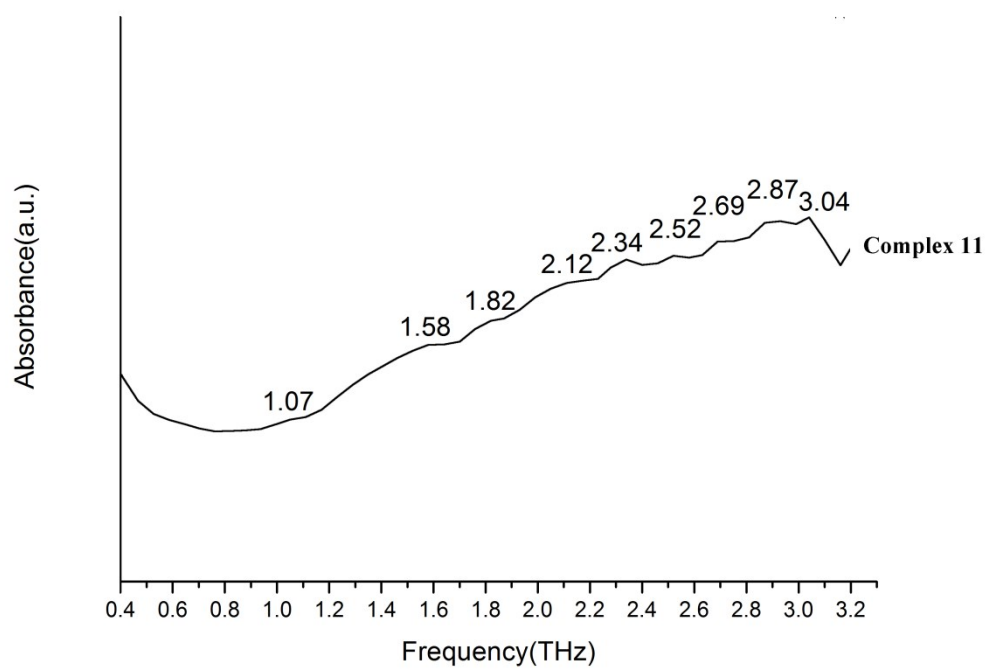

Fig. S12 THz absorption spectra of complex **11**.

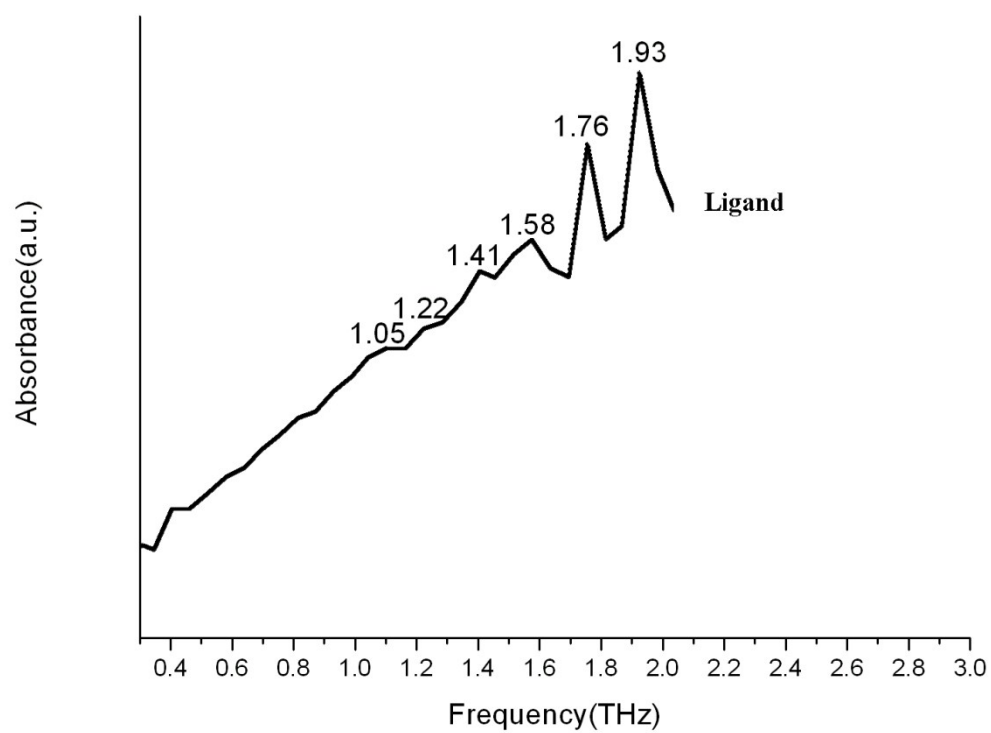

Fig. S13 THz absorption spectra of L ligand.
